## ***Inhibition of Nitric Oxide Synthase Prevents Hyporesponsiveness to Inhaled Nitric Oxide in Lungs from Endotoxin-challenged Rats***

Alexandra Holzmann, M.D.,\* Claire Manktelow, M.D.,\* Friedemann J. H. Taut, M.D.,† Kenneth D. Bloch, M.D.,‡ Warren M. Zapol, M.D.§

**Background:** Inhalation of nitric oxide (NO) selectively dilates the pulmonary circulation and improves arterial oxygenation in patients with adult respiratory distress syndrome (ARDS). In approximately 60% of patients with septic ARDS, minimal or no response to inhaled NO is observed. Because sepsis is associated with increased NO production by inducible NO synthase (NOS2), the authors investigated whether NOS inhibition alters NO responsiveness in rats exposed to gram-negative lipopolysaccharide (LPS).

**Methods:** Sprague-Dawley rats were treated with 0.4 mg/kg *Escherichia coli* 0111:B4 LPS with or without dexamethasone (inhibits NOS2 gene expression; 5 mg/kg), L-NAME (a nonselective NOS inhibitor; 7 mg/kg), or aminoguanidine (selective NOS2 inhibitor; 30 mg/kg). Sixteen hours after LPS treatment, lungs were isolated-perfused; a thromboxane-analog U46619 was added to increase pulmonary artery pressure (PAP) by 5

mmHg, and the pulmonary vasodilator response to inhaled NO was measured.

**Results:** Ventilation with 0.4, 4, and 40 ppm NO decreased the PAP less than in lungs of LPS-treated rats ( $0.75 \pm 0.25$ ,  $1.25 \pm 0.25$ ,  $1.75 \pm 0.25$  mmHg) than in lungs of control rats ( $3 \pm 0.5$ ,  $4.25 \pm 0.25$ ,  $4.5 \pm 0.25$  mmHg;  $P < 0.01$ ). Dexamethasone treatment preserved pulmonary vascular responsiveness to NO in LPS-treated rats ( $3.75 \pm 0.25$ ,  $4.5 \pm 0.25$ ,  $4.5 \pm 0.5$  mmHg, respectively;  $P < 0.01$  vs. LPS, alone). Responsiveness to NO in LPS-challenged rats was also preserved by treatment with L-NAME ( $3.0 \pm 1.0$ ,  $4.0 \pm 1.0$ ,  $4.0 \pm 0.75$  mmHg, respectively;  $P < 0.05$  vs. LPS, alone) or aminoguanidine ( $1.75 \pm 0.25$ ,  $2.25 \pm 0.5$ ,  $2.75 \pm 0.5$  mmHg, respectively;  $P < 0.05$  vs. LPS, alone). In control rats, treatment with dexamethasone, L-NAME, and aminoguanidine had no effect on inhaled NO responsiveness.

**Conclusion:** These observations demonstrate that LPS-mediated increases in pulmonary NOS2 are involved in decreasing responsiveness to inhaled NO. (Key words: Aminoguanidine; dexamethasone; pulmonary circulation.)

\* Research Fellow, Department of Anesthesia and Critical Care, Harvard Medical School at Massachusetts General Hospital.

† Resident in Anesthesia, Department of Anesthesiology, University of Heidelberg, Heidelberg, Germany.

‡ Associate Professor of Medicine, Department of Medicine, Cardiovascular Research Center, Massachusetts General Hospital and Harvard Medical School.

§ Reginald Jenney Professor of Anaesthesia, Department of Anesthesia and Critical Care, Massachusetts General Hospital and Harvard Medical School.

Received from the Massachusetts General Hospital and Harvard Medical School, Boston, Massachusetts. Submitted for publication June 15, 1998. Accepted for publication March 1, 1999. Supported by Deutsche Forschungsgemeinschaft (DFG; Bonn, Germany) Grant HO1651/2 (AH) and USPHS grants HL-42397 (WMZ) and HL-55377 (KDB) from the National Institutes of Health, Bethesda, Maryland. KDB is an Established Investigator of the American Heart Association, Dallas, Texas. Presented in part at the Experimental Biology Meeting, New Orleans, Louisiana, April 6-9, 1997, and at the Deutscher Anästhesiekongress meeting, Hamburg, Germany, April 23-26, 1997. The Massachusetts General Hospital has obtained patents on the use of inhaled nitric oxide. The authors have rights to receive royalties.

Address reprint requests to Dr. Zapol: Department of Anaesthesia and Critical Care, Massachusetts General Hospital, Boston, Massachusetts 02114. Address electronic mail to: wzapol@etherdome.mgh.harvard.edu

INHALATION of nitric oxide (NO) selectively dilates the pulmonary circulation and increases arterial oxygenation by enhancing the matching of perfusion and ventilation in patients with adult respiratory distress syndrome (ARDS).<sup>1,2</sup> In approximately 30% of patients with ARDS, minimal or no pulmonary vasodilator or oxygenation response to inhaled NO is observed.<sup>2</sup> The mechanisms of hyporesponsiveness to inhaled NO are unknown, but the evidence suggests that gram-negative bacteremia and endotoxemia, the most common clinical causes of ARDS, contribute to NO hyporesponsiveness. In patients with septic ARDS, 60% had little or no vasodilator or oxygenation response to inhaling 18 or 36 parts per million (ppm) NO.<sup>3</sup>

Nitric oxide is a lipid-soluble free radical molecule with a short half-life in biological fluids. In the presence of oxygen, NO is produced from L-arginine by nitric oxide synthase (NOS) enzymes. NOS enzymes are divided into two classes, constitutive and inducible. The activities of the constitutive isoforms, neuronal NOS (NOS1) and endothelial NOS (NOS3), are dependent on

intracellular calcium levels. Inducible NOS (NOS2) expression is stimulated by endotoxin and cytokines and inhibited by glucocorticoids.<sup>4,5</sup> In pulmonary vascular smooth muscle cells, NO activates soluble guanylate cyclase, an enzyme responsible for the conversion of guanosine triphosphate (GTP) to guanosine 3',5'-cyclic monophosphate (cGMP).<sup>6</sup> cGMP activates cGMP-dependent protein kinases, leading to decreased pulmonary vascular smooth muscle tone.

We previously used an isolated-perfused rat lung model to investigate the mechanisms regulating pulmonary vascular responsiveness to inhaled NO.<sup>7</sup> We observed that responsiveness to inhaled NO was decreased in lungs from rats pretreated with endotoxin-lipopolysaccharide (LPS). In this study, we hypothesized that in LPS-treated rats increased pulmonary NO production associated with induction of NOS2 expression contributes to the development of hyporesponsiveness to inhaled NO. To test this hypothesis, the effects of NOS inhibition on the ability of inhaled NO to induce pulmonary vasodilation was examined in isolated, perfused, and ventilated lungs from LPS-treated rats. We report here that agents that inhibit endotoxin-stimulated NO production—dexamethasone, N<sup>G</sup>-L-arginine methyl ester (L-NAME), and aminoguanidine—prevented the development of hyporesponsiveness to inhaled NO caused by LPS exposure.

## Materials and Methods

These investigations were approved by the Subcommittee for Research Animal Studies of the Massachusetts General Hospital, Boston, Massachusetts.

### *Isolated, Perfused Rat Lungs*

Lungs obtained from rats were isolated, perfused, and ventilated as described previously.<sup>7</sup> Briefly, adult Sprague-Dawley rats (Charles River Laboratories, Wilmington, MA), weighing 450–550 g, were killed by intraperitoneal injection of sodium pentothal (100 mg/kg body weight). After a midline thoracotomy, the pulmonary artery and left atrium were cannulated. Lungs were perfused with Hank's balanced salt solution containing 5% dextran, 5% bovine serum, 580  $\mu$ M L-NAME, and 30  $\mu$ M indomethacin, using a roller pump (Cardiovascular Instrument, Wakefield, MA) at a pulsatile flow of 0.03 ml  $\cdot$  g body weight<sup>-1</sup>  $\cdot$  min<sup>-1</sup> in a recirculating system at 37°C. The perfusate was continuously aerated with 95% O<sub>2</sub> and 5% CO<sub>2</sub> in the presence of NaHCO<sub>3</sub> to adjust and

maintain pH, P<sub>CO<sub>2</sub></sub>, and P<sub>O<sub>2</sub></sub> between 7.35–7.40, 35–40 mmHg, and 150–250 mmHg, respectively.

Pulmonary artery pressure (PAP) and left atrial pressure were measured *via* small catheters (PE-50 tubing) placed within the lumen of the inflow and outflow perfusion catheters, respectively. Left atrial pressure was set at 4 mmHg. PAP measurements were recorded in increments of 0.25 mmHg.

### *Measurement of Pulmonary Vasoreactivity to Inhaled Nitric Oxide*

In isolated-perfused lungs, the stable thromboxane analog U46619 (Cayman Chemical, Ann Arbor, MI) was administered to increase PAP by 5 mmHg. Next, the infusion rate was adjusted to infuse the minimum quantity required to maintain a stably elevated PAP. The lungs were ventilated with 0.4, 4, and 40 ppm NO in random order for periods of 3 min. After each period of NO ventilation, the PAP was allowed to increase to the elevated baseline.

Nitric oxide gas was obtained from Airco (Hingham, MA) as a mixture of 800 ppm NO in pure N<sub>2</sub>. Variable concentrations of NO were mixed with 21% O<sub>2</sub> and balanced N<sub>2</sub> just before entering the ventilator. NO levels were measured during each administration by chemoluminescence analysis (Eco Physics CLD 700AL, Dürnten, Switzerland).

### *Pulmonary Vasoreactivity to Inhaled NO in Rats Treated with Lipopolysaccharide, Dexamethasone, L-NAME, and Aminoguanidine*

Eight groups of rats were studied. In four groups (A, B, C, D), the animals were injected intraperitoneally 16 h before the lung perfusion experiments with 0.4 mg/kg *Escherichia coli* 0111:B4 LPS (Difco Laboratories, Detroit, MI). The other four groups remained untreated as controls (E, F, G, H). Two groups of rats (B, n = 9; F, n = 10) were injected intraperitoneally with dexamethasone (5 mg/kg) 1 h before LPS-injection. Groups C (n = 6) and G (n = 7) received L-NAME (7 mg/kg) by intraperitoneal injection 2 h after LPS treatment. Groups D (n = 7) and H (n = 5) received aminoguanidine (30 mg/kg) by intraperitoneal injection 4 h after LPS treatment. Group A (n = 8) and Group E (n = 6) received no additional treatment. Sixteen hours after LPS injection, the lungs were isolated, perfused, and ventilated. Then pulmonary vasoreactivity to inhaled NO was measured as described previously.

### *Nitrite and Nitrate Levels in Perfusate of Isolated Lungs from Rats Treated with Aminoguanidine*

Rats were pretreated with an intraperitoneal injection of 0.5 mg/kg LPS ( $n = 12$ ) or were untreated control rats ( $n = 9$ ). Four hours later, LPS-treated ( $n = 7$ ) and control rats ( $n = 4$ ) received an intraperitoneal injection of aminoguanidine (30 mg/kg). After 12–14 h, lungs were isolated-perfused as described previously, except that in these studies, L-NAME was omitted from the perfusate. Perfusate samples were taken after 30 min of perfusion and nitrite–nitrate levels determined as described previously.<sup>8</sup> In brief, 100  $\mu$ l of the perfusate was diluted with 500  $\mu$ l phosphate buffer (pH, 7.5). Nitrate was reduced to nitrite using nitrate reductase (50  $\mu$ l; 1 U/ml; Sigma, Deisenhofen, Germany) and NADPH (50  $\mu$ l; 1.8 mM) was added. After 2 h of incubation, excess NADPH was oxidized by adding 50  $\mu$ l phenazine methosulfate (80  $\mu$ M). Then, 100  $\mu$ l zinc acetate (0.5 M) and 100  $\mu$ l NaOH (0.5 M) were added to deproteinate the solution. Nitrite was measured in the supernatant by Griess assay adding 250  $\mu$ l sulfanilamide (0.1 M in 1.5 M phosphoric acid) and 250  $\mu$ l naphthylethylenediamine (8 mM). Colorimetric absorption at 540 nm was linearly correlated with nitrite concentration.

### *Pulmonary Vasoreactivity to Isoproterenol*

Rats were treated either with an intraperitoneal injection of LPS ( $n = 19$ ) or remained untreated as control rats ( $n = 9$ ). Four hours later, six LPS-treated rats and four control rats received aminoguanidine (30 mg/kg) by intraperitoneal injection. Twelve to 14 h later, lungs were isolated-perfused and precontracted with the thromboxane analog U46619. Then, isoproterenol (10  $\mu$ M) was added to the perfusate, and the reduction of pulmonary artery pressure (PAP) was measured.

### *Pulmonary Vasoreactivity to Inhaled NO after Prolonged Breathing of NO*

Three rats were placed in a 40-l acrylic chamber and exposed to 80 ppm NO, as previously described.<sup>9</sup> The  $F_{I_{O_2}}$  and concentrations of NO, nitrogen dioxide, and nitrogen with higher oxidation states (NOx) were measured continuously. After 19–24 h, lungs were isolated, perfused, and ventilated, and the pulmonary vasoreactivity to 4 ppm NO was measured.

### *Statistical Analysis*

The measurements of the pulmonary vasodilator response to inhaled NO were the absolute changes in PAP

caused by ventilation with three concentrations of NO gas. Multivariate analysis of variance (ANOVA) with repeated-measures techniques was used to examine the effects of LPS (controls *vs.* LPS-treated), specific treatment (dexamethasone, L-NAME, and aminoguanidine *vs.* none) and NO dose simultaneously. The treatment difference (treatment *vs.* none) between the LPS-treated rats and control rats was examined by testing the interaction term (treatment + LPS) in the model. All data are expressed as mean  $\pm$  SD. Statistical significance was reached when  $P < 0.05$ .

## Results

### *Dexamethasone Prevents Hyporesponsiveness to Inhaled Nitric Oxide*

To begin to investigate whether NOS2 induction contributes to NO hyporesponsiveness, we measured pulmonary vasoreactivity to inhaled NO in rats treated or untreated with dexamethasone 1 h before LPS-exposure. In control lungs, 0.4, 4, and 40 ppm NO dilated the pulmonary circulation by  $56 \pm 8$ ,  $79 \pm 3$ , and  $86 \pm 2\%$ , respectively, of the vasoconstriction induced by U46619 (fig. 1). In lungs of animals treated with LPS, 0.4, 4, and 40 ppm NO vasodilated less ( $15 \pm 5$ ,  $26 \pm 5$ , and  $34 \pm 5\%$ , respectively; overall  $P < 0.01$  *vs.* control lungs). Administration of dexamethasone 1 h before LPS treatment completely prevented the hyporesponsiveness to inhaled NO: inhalation of 0.4, 4, and 40 ppm NO decreased PAP by  $71 \pm 3$ ,  $82 \pm 3$ , and  $89 \pm 1\%$ , respectively (overall  $P < 0.01$  *vs.* LPS-treated rats without dexamethasone). In lungs from control rats, dexamethasone had no effect on the vasodilator activity of inhaled NO ( $70 \pm 7$ ,  $79 \pm 6$ , and  $82 \pm 4\%$ , respectively).

### *Nonselective NOS Inhibition Improves Nitric Oxide Responsiveness in Lungs from LPS-treated Rats*

To determine whether inhibition of pulmonary NO production prevents the development of hyporesponsiveness to inhaled NO, we administered L-NAME, a nonselective inhibitor of NOS activity, 2 h after LPS exposure. Compared with lungs from rats exposed to LPS alone, treatment with L-NAME of LPS-challenged rats improved the ability of inhaled NO to dilate the pulmonary circulation (fig. 2): 0.4, 4, and 40 ppm NO decreased PAP by  $41 \pm 11$ ,  $59 \pm 11$ , and  $58 \pm 8\%$ , respectively (overall  $P < 0.05$  values differ compared

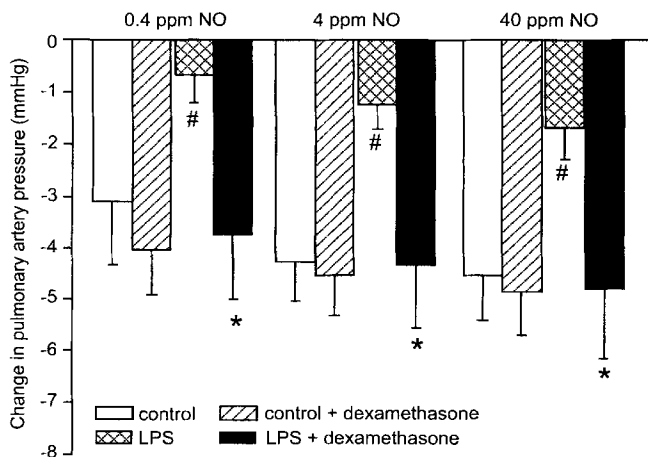

**Fig. 1.** Pretreatment with dexamethasone prevents hyporesponsiveness to inhaled NO in lungs from LPS-treated rats. Two groups of rats were treated with LPS (0.4 mg/kg,  $n = 6$ ) or remained untreated as control rats ( $n = 8$ ). An additional 19 rats received an injection of dexamethasone (5 mg/kg), of which 9 received LPS 1 h later. Sixteen hours after LPS-injection, the lungs were isolated, perfused, and ventilated. The PAP was increased by 5 mmHg using U46619, and decreases in PAP during ventilation with 0.4, 4, and 40 ppm NO were measured. In LPS-treated lungs, PAP decreased less than in lungs from control rats ( $\# P < 0.01$  LPS differs from controls). Pretreatment with dexamethasone completely prevented hyporesponsiveness to inhaled NO in lungs from LPS-treated rats ( $*P < 0.01$  when comparing LPS-treated rats with and without dexamethasone at each NO level).

with LPS-treated rats without L-NAME). Administration of L-NAME to control rats had no effect on responsiveness to ventilation with 0.4, 4, and 40 ppm NO ( $43 \pm 2$ ,  $69 \pm 8$ , and  $85 \pm 6\%$ , respectively).

#### *Treatment with Aminoguanidine Improves Responsiveness to Inhaled Nitric Oxide*

To further examine whether the inhibition of pulmonary NO production associated with increased NOS2 activity contributes to NO hyporesponsiveness, we administered aminoguanidine, a selective inhibitor of NOS2, 4 h after exposure to LPS (fig. 3). Aminoguanidine improved the ability of lungs obtained from LPS-treated rats to vasodilate in response to inhalation of 0.4, 4, and 40 ppm NO with PAP reduced by  $34 \pm 6$ ,  $44 \pm 6$ , and  $52 \pm 6\%$ , respectively (overall  $P < 0.05$  vs. LPS-treated rats without aminoguanidine). In lungs from control rats, aminoguanidine treatment had no effect on pulmonary vasoreactivity to 0.4, 4, and 40 ppm NO ( $56 \pm 5$ ,  $67 \pm 6$ , and  $75 \pm 6\%$ , respectively).

#### *Aminoguanidine Decreases Release of Nitrite-Nitrate into the Perfusate of Lungs Obtained from Rats Treated with LPS*

To demonstrate that aminoguanidine inhibits endogenous NO production in lungs from rats exposed to LPS, we measured nitrite and nitrate levels in the perfusate of isolated lungs obtained from rats with and without LPS pretreatment (fig. 4). Compared with LPS-treated rats without aminoguanidine, total perfusate levels of nitrite and nitrate were lower in the perfusate of lungs from LPS-treated rats given aminoguanidine ( $16 \pm 7 \mu\text{M}$  vs.  $7 \pm 2 \mu\text{M}$ ;  $P < 0.05$ ). Aminoguanidine did not alter the combined nitrate and nitrite levels in perfusate from the lungs of rats not exposed to LPS.

#### *Lipopolysaccharide Does Not Affect the Pulmonary Vasoreactivity to Isoproterenol*

To determine whether LPS induced a nonspecific change of pulmonary vascular responsiveness, we measured pulmonary vasoreactivity to isoproterenol, a  $\beta$ -agonist, in control and LPS-treated rats. The pulmonary vasodilator response to isoproterenol did not differ in control lungs and in lungs obtained from LPS-treated rats ( $59 \pm 20\%$  vs.  $36 \pm 17\%$ ;  $P = \text{NS}$ ). Moreover, aminoguanidine did not affect the response to isoproterenol in

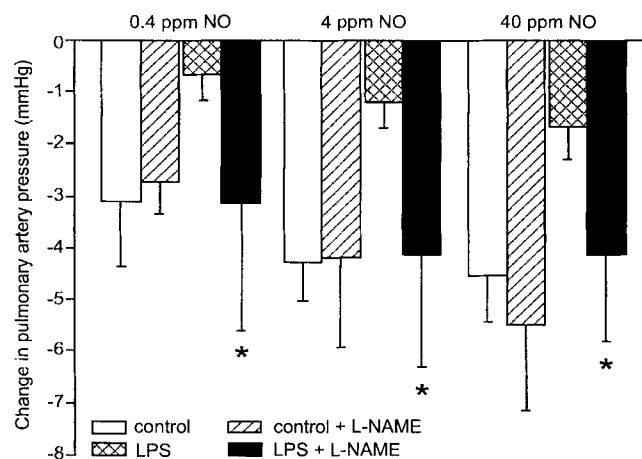

**Fig. 2.** Treatment with the NOS inhibitor L-NAME improves responsiveness to inhaled NO in lungs of LPS-treated rats. Untreated control rats ( $n = 7$ ) and rats treated with LPS 2 h earlier ( $n = 6$ ) received a bolus injection of L-NAME (7 mg/kg). Fourteen hours after L-NAME administration, the lungs were isolated and perfused. The PAP was increased by 5 mmHg using U46619, and decreases in PAP during ventilation of 0.4, 4, and 40 ppm NO were measured. Early administration of L-NAME improved responsiveness to inhaled NO in lungs from LPS-treated rats ( $*P < 0.05$  values differ when comparing LPS-treated rats with and without L-NAME at each NO level).

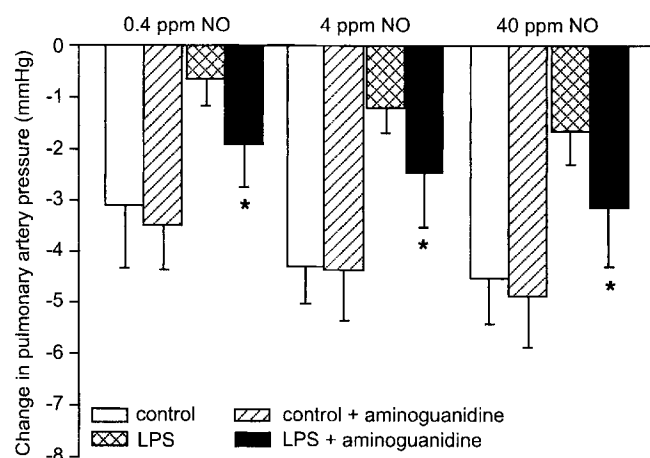

**Fig. 3.** Treatment with the NOS2-selective inhibitor aminoguanidine improves responsiveness to inhaled NO in lungs of LPS-treated rats. Rats were treated with LPS ( $n = 7$ ) or remained untreated control rats ( $n = 5$ ). After 4 h, rats received a bolus injection of aminoguanidine (30 mg/kg), and 12 h later, the lungs were isolated, perfused, and ventilated. The PAP was elevated using U46619, and the vasodilator response to ventilation with 0.4, 4, and 40 ppm NO was measured. Compared to lungs from LPS-treated rats without aminoguanidine ( $n = 6$ ), there was an improved response to inhaled NO in lungs from rats treated with LPS and aminoguanidine (\* $P < 0.05$  LPS with aminoguanidine differs from LPS alone at each level of NO).

either control rats ( $61 \pm 29\%$ ) or LPS-treated rats ( $39 \pm 9\%$ ).

#### *Pulmonary Vasoreactivity to Inhaled NO in Rats after Prolonged Breathing of Nitric Oxide*

To examine whether increased pulmonary NO levels, in the absence of LPS, can decrease pulmonary vasoreactivity to acutely inhaled NO, rats ( $n = 3$ ) breathed 80 ppm NO in air for approximately 20 h. Isolated-perfused lungs from these rats vasodilated modestly less in response to ventilation with 4 ppm NO than lungs from control rats ( $67 \pm 2\%$  vs.  $79 \pm 8\%$ ,  $P < 0.005$ ).

## Discussion

Inhalation of NO selectively dilates the pulmonary circulation and improves arterial oxygenation in patients with ARDS. However, up to 60% of patients with septic ARDS do not respond or respond only minimally to inhaled NO with improved oxygenation.<sup>3</sup> Because sepsis, the most common cause of ARDS, promotes increased NO production by NOS2,<sup>5,10-12</sup> we studied the effects of inhibitors of NOS2 gene expression and enzyme activity on responsiveness to inhaled NO using isolated, perfused, and ventilated lungs obtained from

LPS-treated rats. We previously observed that, in isolated-perfused lungs from rats exposed to LPS, the ability of inhaled NO to induce pulmonary vasodilation is impaired.<sup>7</sup> Systemic administration of LPS stimulates NOS2 synthesis in a variety of cell types, including pulmonary vascular cells.<sup>4,5,13</sup> We hypothesized that increased pulmonary NO levels in LPS-treated rats contribute to impaired pulmonary vascular responsiveness to inhaled NO.

Glucocorticoids block LPS-induced synthesis of NOS2 and the associated increase in NO levels.<sup>12,14,15</sup> Pretreatment with dexamethasone completely preserved the ability of inhaled NO to decrease PAP in lungs obtained from LPS-treated rats (fig. 1). These results suggest that, in our model, NOS2 synthesis induced by administration of LPS contributes to the development of hyporesponsiveness to inhaled NO. These findings are supported by a study of Tsuchida *et al.* who observed that, in rat aortic strips incubated *in vitro* with LPS, impaired vasodilation in response to sodium nitroprusside (SNP) was prevented by coadministration of dexamethasone with

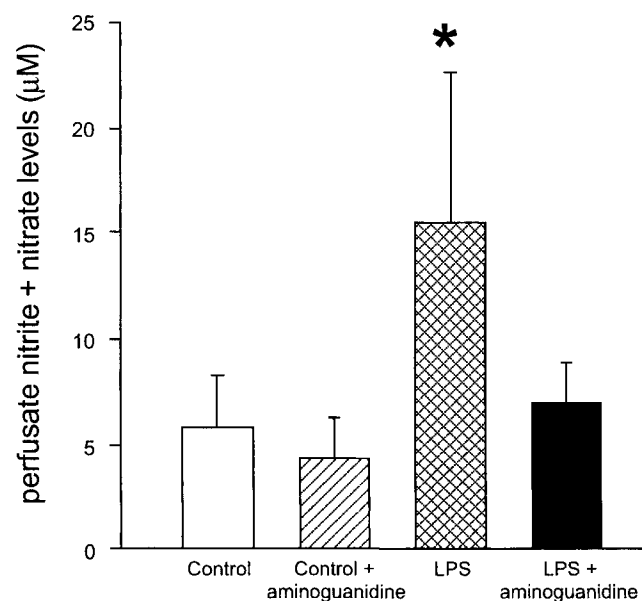

**Fig. 4.** Aminoguanidine decreases release of nitrite and nitrate into the perfusate of lungs obtained from rats treated with LPS. Rats were pretreated with an intraperitoneal injection of 0.5 mg/kg LPS ( $n = 12$ ) or were untreated control rats ( $n = 9$ ). Four hours later, seven of the LPS-treated rats and four of the control rats received an intraperitoneal injection of aminoguanidine (AG; 30 mg/kg). After 12–14 h, the lungs were isolated and perfused, and perfusate samples were taken after 30 min of perfusion. Compared with LPS-treated rats without aminoguanidine, the combined nitrite and nitrate levels were less in the perfusate of lungs from LPS-treated rats given aminoguanidine (\* $P < 0.05$  values differ).

LPS.<sup>16</sup> However, dexamethasone modulates the induction of a variety of enzymes in addition to NOS2, which may contribute to the development of hyporesponsiveness to inhaled NO.

To further investigate whether increased NO production by NOS in LPS-treated rats alters pulmonary vascular responsiveness to inhaled NO, we used L-NAME, an L-arginine analog, to inhibit NOS activity. L-NAME inhibits NOS activity in endotoxin-treated animals, as reflected by decreased tissue cGMP levels and plasma nitrate and nitrite levels.<sup>14-17</sup> In our study, we observed that injection of L-NAME 2 h after LPS treatment preserved pulmonary vascular responsiveness to inhaled NO (fig. 2). These results indicate that inhibition of LPS-induced pulmonary NO production prevents the development of inhaled NO hyporesponsiveness. Once again, our results are supported by the observation of Tsuchida *et al.*, who reported that, in isolated rat aortic strips incubated with LPS *in vitro*, impaired ability of SNP to induce relaxation was restored by incubation with N<sup>G</sup>-nitro-L-arginine for 30 min.<sup>16</sup>

We next sought to determine if LPS-stimulated NO production by the inducible NOS isoform, NOS2, contributes to the development of NO hyporesponsiveness in LPS-treated rats. A number of studies have demonstrated that aminoguanidine (15–45 mg/kg) selectively inhibits NOS2 but not NOS3 activity.<sup>18-21</sup> Griffiths *et al.* observed that, in pulmonary arteries obtained from rats exposed to LPS, aminoguanidine selectively inhibits NOS2.<sup>18</sup> In our model, administration of aminoguanidine 4 h after LPS administration preserved pulmonary vascular responsiveness to inhaled NO (fig. 3) and decreased nitrite and nitrate release into the perfusate of isolated lungs (fig. 4). Of note, aminoguanidine administration did not alter nitrite and nitrate release into the perfusate of lungs isolated from rats that were not exposed to LPS, suggesting that aminoguanidine was selective for LPS-induced NOS activity (likely attributable to NOS2). These results suggest that increased NO production associated with NOS2 synthesis contributes to the development of hyporesponsiveness to inhaled NO in LPS-treated rats. However, aminoguanidine has also been demonstrated to scavenge peroxynitrite, which could contribute to the development of hyporesponsiveness to inhaled NO: in cultured macrophages, aminoguanidine inhibited peroxynitrite-induced benzoate hydroxylation and 4-hydroxyphenylacetic acid nitration.<sup>20</sup>

A number of studies have demonstrated that administration of nonselective NOS inhibitors augments tissue damage and increases the mortality rate in rodents and

dogs exposed to LPS.<sup>22-24</sup> In contrast, selective inhibition of NOS2 has been shown to improve survival in rodent models of sepsis.<sup>25,26</sup> These considerations suggest that early treatment with a selective NOS2 inhibitor, similar to aminoguanidine, may preserve responsiveness to inhaled NO in those with ARDS associated with sepsis.

The observations presented herein suggest that, in an animal model of sepsis, enhanced endogenous NO production by NOS2 is required for the development of hyporesponsiveness to inhaled NO. However, it is uncertain whether increased pulmonary NO concentrations alone are sufficient to produce hyporesponsiveness to inhaled NO. Combs *et al.* reported that in isolated-perfused lungs from rats breathing 30 ppm NO for 48 h during normoxic conditions, vasodilation to SNP was preserved.<sup>27</sup> Frank *et al.* recently reported that responsiveness to inhaled NO was not altered in isolated-perfused lungs from rats exposed to 20 ppm NO for up to 3 weeks.<sup>28</sup> In our study, the vasodilator effect of 4 ppm NO on the isolated-perfused lungs obtained from rats exposed to 80 ppm NO for approximately 20 h was only 15% less than that observed in control rat lungs. In contrast, the pulmonary vasodilator effect of 4 ppm NO was 67% less in lungs from LPS-treated rats than that in lungs from untreated rats. These results suggest that increased pulmonary NO levels alone are insufficient to induce hyporesponsiveness to inhaled NO. It is likely that other sepsis-induced factors act together with NO, leading to the development of NO hyporesponsiveness. One example of such a sepsis-induced factor may be superoxide, which can react with NO to form the potentially toxic metabolite peroxynitrite.<sup>29</sup> Furthermore, under some conditions, NOS can generate superoxide, a process that is inhibitable by arginine analogs and that could contribute to the development of hyporesponsiveness to inhaled NO.<sup>30</sup>

In summary, the inhibition of either NOS2 gene expression or NOS2 enzyme activity preserves the ability of inhaled NO to dilate the pulmonary circulation of rats exposed to LPS. Preservation of NO responsiveness by inhibition of NOS2 in the rat exposed to LPS suggests that increased pulmonary NO production may contribute at least in part to the development of NO hyporesponsiveness in patients with ARDS due to sepsis. These observations suggest that treatment with a selective NOS2 inhibitor may prevent the development of inhaled NO hyporesponsiveness in patients with ARDS associated with sepsis.

# NOS INHIBITION PREVENTS NO HYPORESPONSIVENESS

The authors thank Melahat Kavosi and Maria del Mar-Aris for technical assistance and Yu Chaio Chang, Ph.D., for statistical assistance.

## References

- Rossaint R, Falke KJ, Lopez F, Slama K, Pison U, Zapol WM: Inhaled nitric oxide for the adult respiratory distress syndrome. *N Engl J Med* 1993; 328:399-405
- Bigatello LM, Hurford WE, Kacmarek RM, Roberts JD, Zapol WM: Prolonged inhalation of low concentrations of nitric oxide in patients with severe adult respiratory distress syndrome—Effects on pulmonary hemodynamics and oxygenation. *ANESTHESIOLOGY* 1994; 80:761-70
- Krafft P, Fridrich P, Fitzgerald RD, Koc D, Steltzer H: Effectiveness of nitric oxide inhalation in septic ARDS. *Chest* 1996; 109:486-93
- Nakayama DK, Geller DA, Lowenstein CL, Davies P, Pitt BR, Simmons RL, Billiar TR: Cytokines and lipopolysaccharide induce nitric oxide synthase in cultured rat pulmonary artery smooth muscle. *Am J Respir Cell Mol Biol* 1992; 7:471-6
- Geller DA, Nussler AK, Silvio Md, Lowenstein CJ, Shapiro RA, Wang SC, Simmons RL, Billiar TR: Cytokines, endotoxin, and glucocorticoids regulate the expression of inducible nitric oxide synthase in hepatocytes. *Proc Natl Acad Sci U S A* 1993; 90:522-6
- Liu SF, Crawley DE, Rohde JA, Evans TW, Barnes PJ: Role of nitric oxide and guanosine 3'-5'-cyclic monophosphate in mediating nonadrenergic, noncholinergic relaxation in guinea-pig pulmonary arteries. *Br J Pharmacol* 1992; 107:861-6
- Holzmann A, Bloch KD, Sanchez LS, Filippov G, Zapol WM: Hyporesponsiveness to inhaled nitric oxide in isolated, perfused lungs from endotoxin-challenged rats. *Am J Physiol* 1996; 271:L981-6
- Oudkerk Pool M, Bouma G, Visser JJ, Kolkman JJ, Tran DD, Meuwissen SGM, Pena AS: Serum nitrate levels in ulcerative colitis and crohns disease. *Scand J Gastroenterol* 1995; 30:784-8
- Roberts JD, Roberts CT, Jones RC, Zapol WM, Bloch KD: Continuous nitric oxide inhalation reduces pulmonary arterial structural changes, right ventricular hypertrophy, and growth retardation in the hypoxic newborn rat. *Circ Res* 1995; 76:215-22
- Asano K, Chee CBE, Gaston B, Lilly CM, Gerard C, Drazen JM, Stamler JS: Constitutive and inducible nitric oxide synthase gene expression, regulation, and activity in human epithelial cells. *Proc Natl Acad Sci U S A* 1994; 91:10089-93
- Wong HR, Carcillo JA, Burckart G, Shah N, Janovsky JE: Increased serum nitrite and nitrate concentrations in children with the sepsis syndrome. *Crit Care Med* 1995; 23:835-42
- Gutierrez HH, Pitt BR, Schwarz M, Watkins SC, Lowenstein C, Caniggia I, Chumley P, Freeman BA: Pulmonary alveolar epithelial inducible NO synthase gene expression: Regulation by inflammatory mediators. *Am J Physiol* 1995; 268:L501-8
- MacNaul KL, Hutchinson NI: Differential expression of iNOS and cNOS mRNA in human vascular smooth muscle cells and endothelial cells under normal and inflammatory conditions. *Biochem Biophys Res Comm* 1993; 196:1330-4
- Griffiths MJD, Liu S, Curzen NP, Messent M, Evans TW: In vivo treatment with endotoxin induces nitric oxide synthase in rat main pulmonary artery. *Am J Physiol* 1995; 268:L509-18
- Tracey WR, Tse J, Carter G: Lipopolysaccharide-induced changes in plasma nitrite and nitrate concentrations in rats and mice: Pharmacological evaluation of nitric oxide inhibitors. *J Pharmacol Exp Ther* 1995; 272:1101-5
- Tsuchida S, Hiraoka M, Sudo M, Kigoshi S, Muramatsu I: Attenuation of sodium nitroprusside responses after prolonged incubation of rat aorta with endotoxin. *Am J Physiol* 1994; 267:H2305-10
- Koga K, Sata T, Nanri H, Ikeda M, Shigematsu A: Role of nitric oxide during carrageenan-sensitized endotoxin shock in mice. *Life Sci* 1995; 57:2309-16
- Griffiths MJD, Messent M, MacAllister RJ, Evans TW: Aminoguanidine selectively inhibits inducible nitric oxide synthase. *Br J Pharmacol* 1993; 110:963-8
- Joly GA, Ayres M, Chelly F, Kilbourn RG: Effect of N<sup>G</sup>-methyl-L-arginine, N<sup>G</sup>-nitro-L-arginine, and aminoguanidine on constitutive and inducible nitric oxide synthase in rat aorta. *Biochem Biophys Res Comm* 1994; 199:147-54
- Szabo C, Ferrer-Sueta G, Zingarelli B, Southan GJ, Salzman AL, Radi R: Mercaptoethylguanidine and guanidine inhibitors of nitric oxide synthase react with peroxynitrite and protect against peroxynitrite-induced oxidative damage. *J Biol Chem* 1997; 272:9030-6
- Arkovitz MS, Wispe JR, Garcia VF, Szabo C: Selective inhibition of the inducible isoform of nitric oxide synthase prevents pulmonary transvascular flux during acute endotoxemia. *J Pediatr Surg* 1996; 31:1009-15
- Hutcheson IR, Whittle BJ, Boughton-Smith NK: Role of nitric oxide in maintaining vascular integrity in endotoxin-induced acute intestinal damage in the rat. *Br J Pharmacol* 1990; 101:815-20
- Nava E, Palmer RM, Moncada S: The role of nitric oxide in endotoxic shock: Effects of N<sup>G</sup>-monomethyl-L-arginine. *J Cardiovasc Pharmacol* 1992; 20:S132-4
- Cobb JP, Natanson C, Hoffman WD, Lodato RF, Banks S, Koev CA, Solomon MA, Elin RJ, Hosseini JM, Danner RL: N-omega-amino-L-arginine, an inhibitor of nitric oxide synthase, raises vascular resistance but increases mortality rates in awake canines challenged with endotoxin. *J Exp Med* 1992; 176:1175-82
- Wu CC, Chen SJ, Szabo C, Thiernerman C, Vane JR: Aminoguanidine attenuates the delayed circulatory failure and improves survival in rodent models of endotoxic shock. *Br J Pharmacol* 1995; 114:1666-72
- Szabo C, Southan GJ, Thiernerman C: Beneficial effects and improved survival in rodent models of septic shock with S-methylisothiourea sulfate, a potent and selective inhibitor of inducible nitric oxide synthase. *Proc Natl Acad Sci U S A* 1994; 91:12472-6
- Combs X, Mazmanian M, Goullain H, Herve P: Effect of 48 hours of nitric oxide inhalation on pulmonary vasoreactivity in rats. *Am J Resp Crit Care Med* 1997; 156:473-7
- Frank DU, Horstman DJ, Morris GN, Johns RA, Rich GF: Regulation of the endogenous NO pathway by prolonged inhaled NO in rats. *J Appl Physiol* 1998; 85:1070-8
- Radi R, Beckman JS, Bush KM, Freeman BA: Peroxynitrite oxidation of sulfhydryls—The cytotoxic potential of superoxide and nitric oxide. *J Biol Chem* 1991; 266:4244-50
- Xia Y, Zweier JL: Superoxide and peroxynitrite generation from inducible nitric oxide synthase in macrophages. *Proc Natl Acad Sci U S A* 1997; 94:6954-8
